# Supplementary material for: Decellularized extracellular matrix derived from dental pulp stem cells promotes gingival fibroblast adhesion and migration
Source: PubMed Central journal article supplement (PMC11443845; doi:10.1186/s12903-024-04882-7), 2024-10-01
Supplement: 12903_2024_4882_MOESM1_ESM.pdf [file 12903_2024_4882_MOESM1_ESM.pdf]

Supplement Figure 1.

A

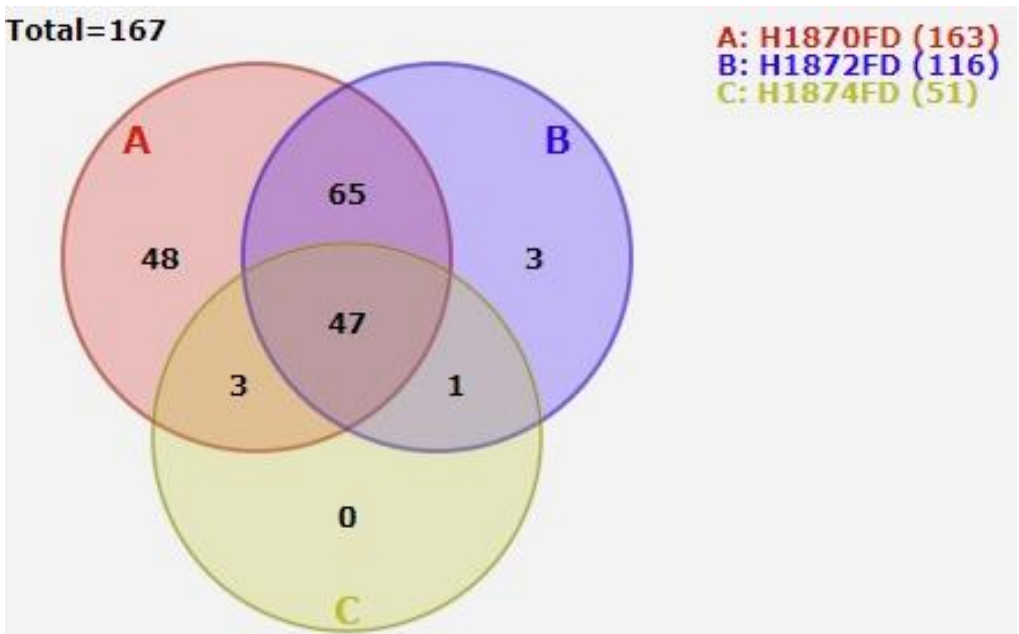

B 47 Common proteins and 3 MCODES

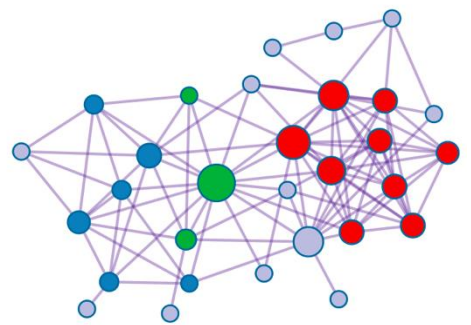

- Collagen-containing extracellular matrix
- Extracellular matrix
- External encapsulating structure

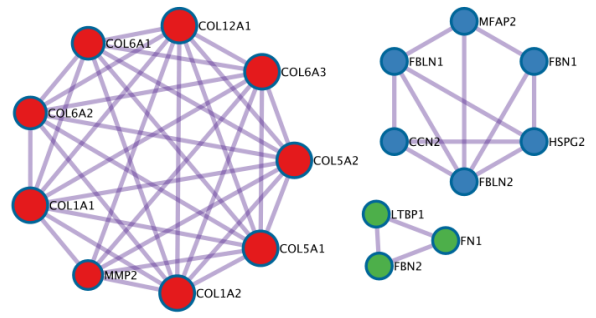

- Collagen degradation, Collagen chain trimerization, ECM structural constituent conferring tensile strength
- ECM collagen, ECM structure, Molecules associated with elastic fibres
- Molecules associated with elastic fibres, Elastic fibre formation, ECM structure
